# Supplementary material for: Distinct solvent- and temperature-dependent packing arrangements of anti-parallel β-sheet polyalanines studied with solid-state13C NMR and MD simulation
Source: Royal Society of Chemistry journal article supplement (doi:10.1039/c7cp03693k), 2017-01-01
Supplement: c7cp03693k1.pdf [file c7cp03693k1.pdf]

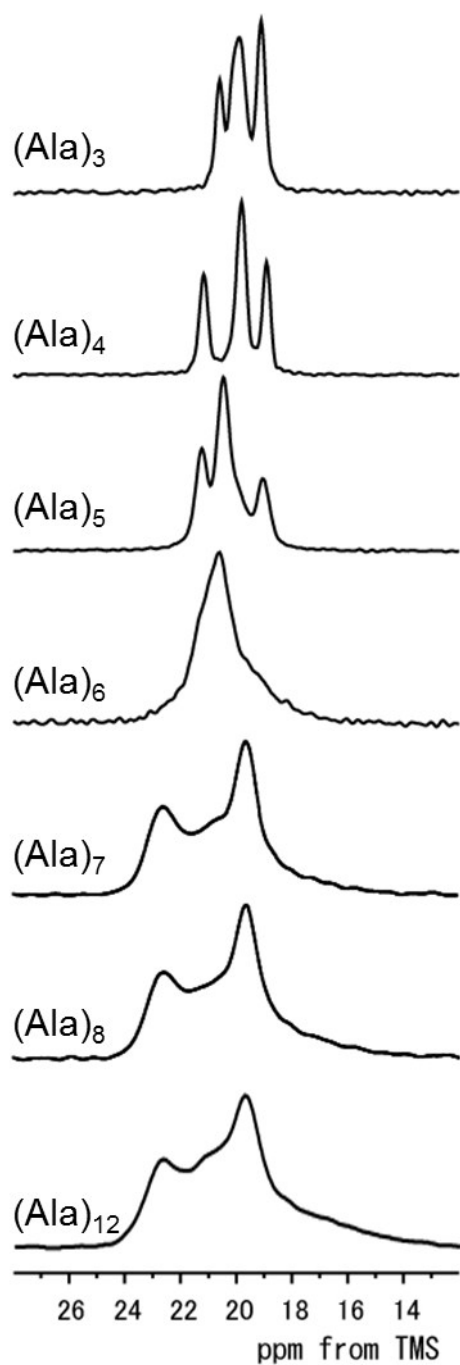

Fig.S-1 Expanded Ala  $\text{C}\beta$  peaks in the  $^{13}\text{C}$  CP/MAS spectra of  $(\text{Ala})_n$  ( $n = 3, 4, 5, 6, 7, 8$  and  $12$ ).

$(\text{Ala})_n$  ( $n = 3, 4, 5$  and  $6$ ) samples were purchased and used without further treatment.  $(\text{Ala})_n$  ( $n = 7, 8$  and  $12$ ) were prepared in this work as precipitated powder after dialysis of the 55%(w/w) LiSCN aqueous solution against water.
